# Supplementary material for: Ultra-wideband self-powered photodetector based on suspended reduced graphene oxide with asymmetric metal contacts
Source: Royal Society of Chemistry journal article supplement (doi:10.1039/d1ra03438c), 2021-01-01
Supplement: d1ra03438c1.pdf [file d1ra03438c1.pdf]

## Electronic Supplementary Information for

### Ultra-wideband self-powered photodetector based on suspended reduced graphene oxide with asymmetric metal contacts

*Qianqian Hu,<sup>a,‡</sup> Yang Cao,<sup>b,c,‡</sup> Yu Liu,<sup>d</sup> Yingxin Wang,<sup>e</sup> Chenfeng Wang,<sup>b</sup> Jia-Lin Zhu,<sup>a</sup> Ning  
Yang,<sup>f</sup> Weidong Chu,<sup>f</sup> Wanyun Ma<sup>\*,a</sup> and Jia-Lin Sun<sup>\*,a</sup>*

*a. State Key Laboratory of Low-Dimensional Quantum Physics, Department of Physics,  
Tsinghua University, Beijing 100084, P. R. China*

*Emails: mawy@tsinghua.edu.cn (Wanyun Ma); jlsun@tsinghua.edu.cn (Jia-Lin Sun);*

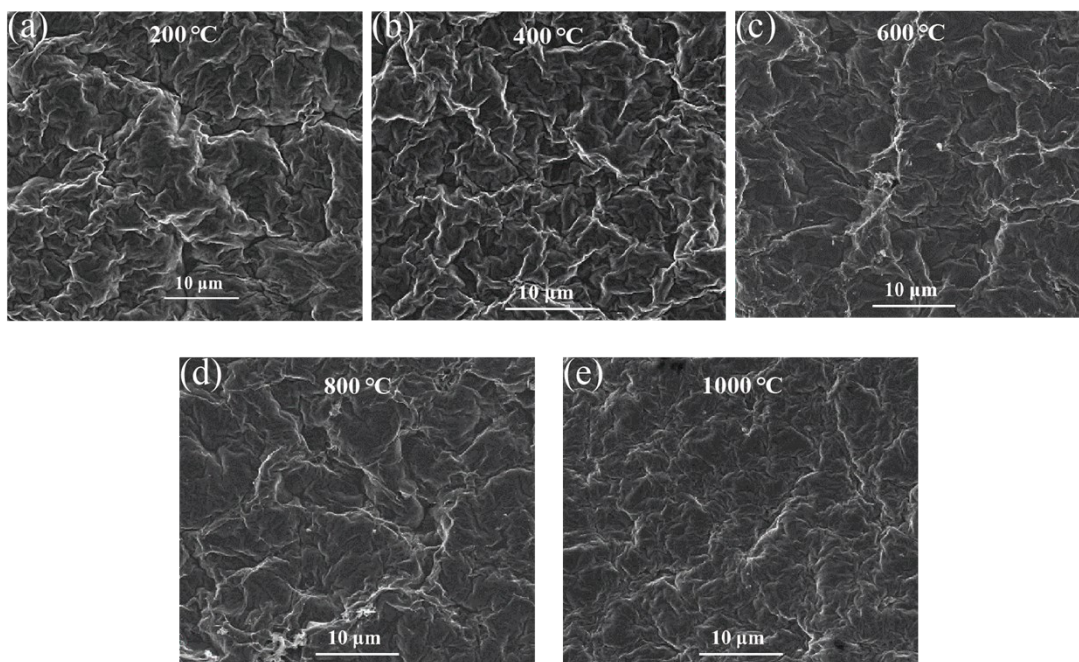

**Fig. S1.** SEM images of rGO films annealed at (a) 200, (b) 400, (c) 600, (d) 800 and (e) 1000 °C.

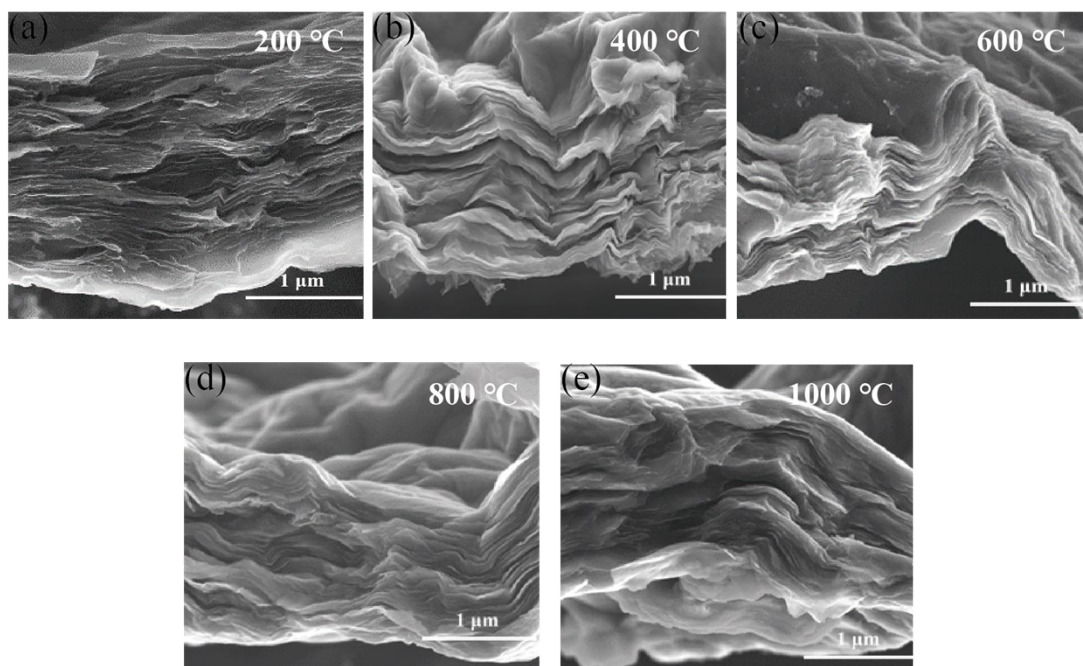

**Fig. S2.** The cross-sectional SEM images of rGO films annealed at (a) 200, (b) 400, (c) 600, (d) 800, and (e) 1000 °C.

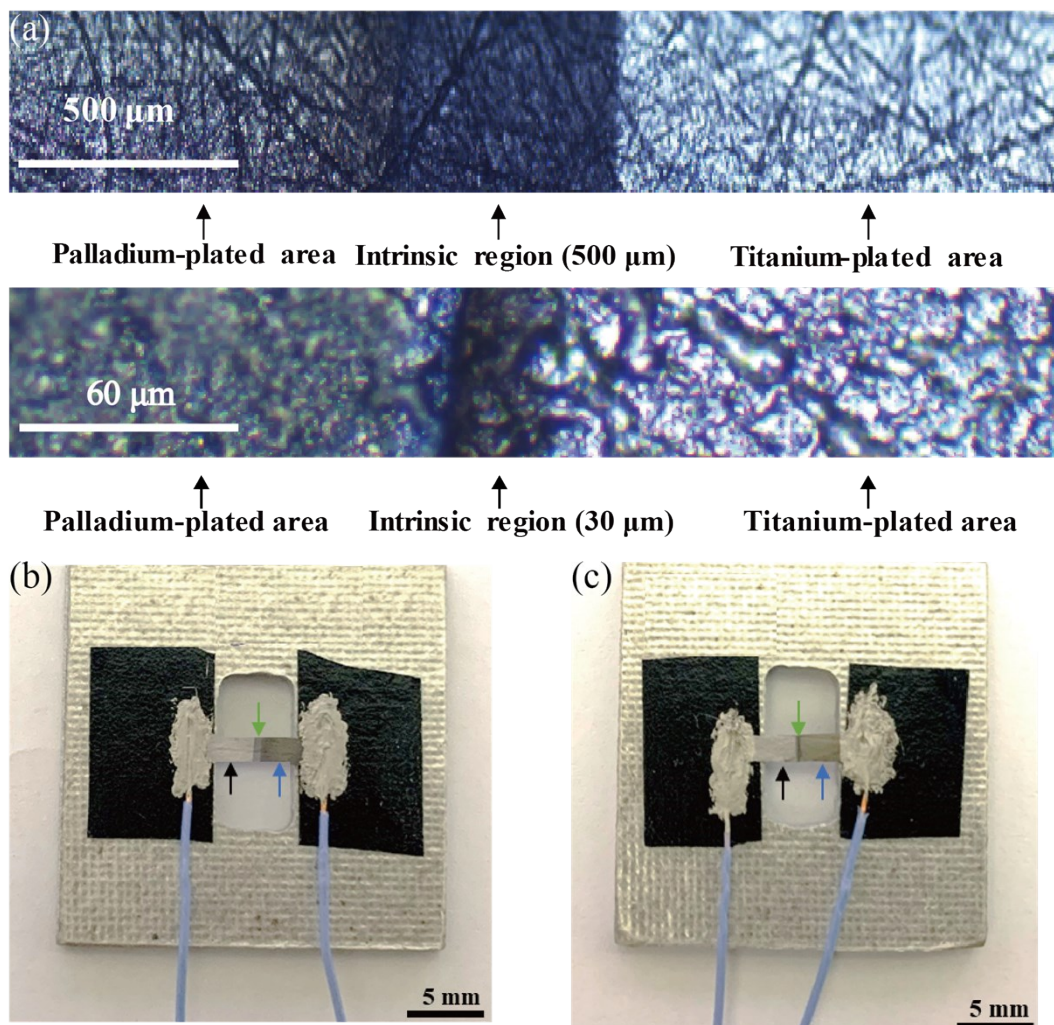

**Fig. S3.** (a) Photomicrograph of the Pd-rGO-Ti nanostructure with two different channel widths: (top) 500  $\mu\text{m}$  and (bottom) 30  $\mu\text{m}$ . The photographs of the photodetectors with two different channel widths: (b) 500  $\mu\text{m}$  and (c) 30  $\mu\text{m}$ . The black arrow, green arrow and blue arrow indicate the palladium-plated area, intrinsic region and titanium-plated area, respectively.

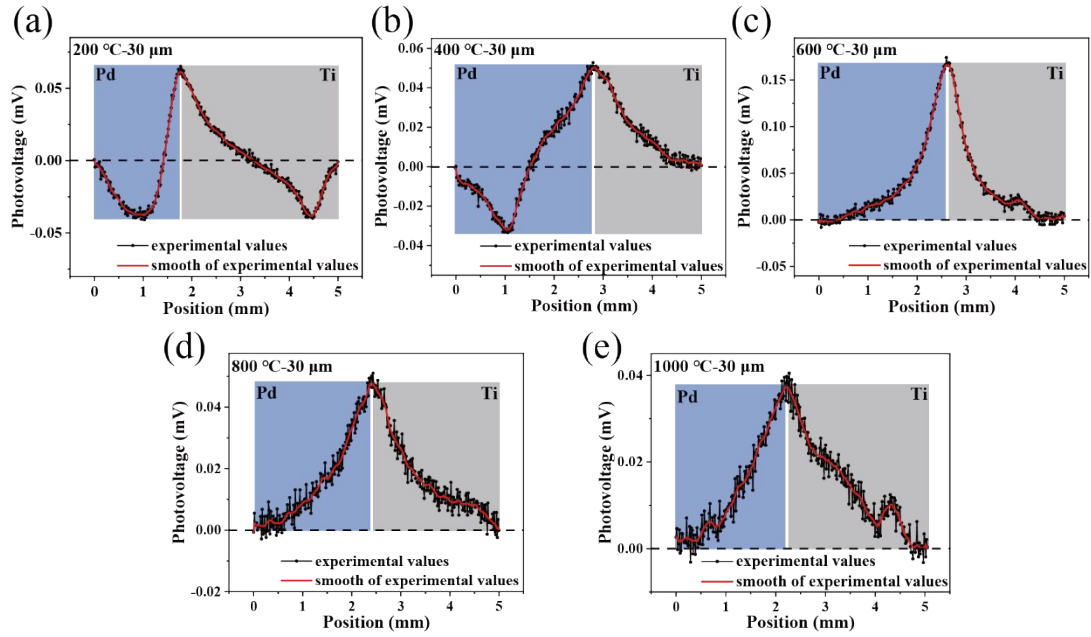

**Fig. S4.** Scanning photovoltage measurement results from the palladium-plated area to the titanium-plated area of photodetectors with 30  $\mu\text{m}$  channel annealed at (a) 200, (b) 400, (c) 600, (d) 800 and (e) 1000  $^{\circ}\text{C}$  under illumination at 532 nm.

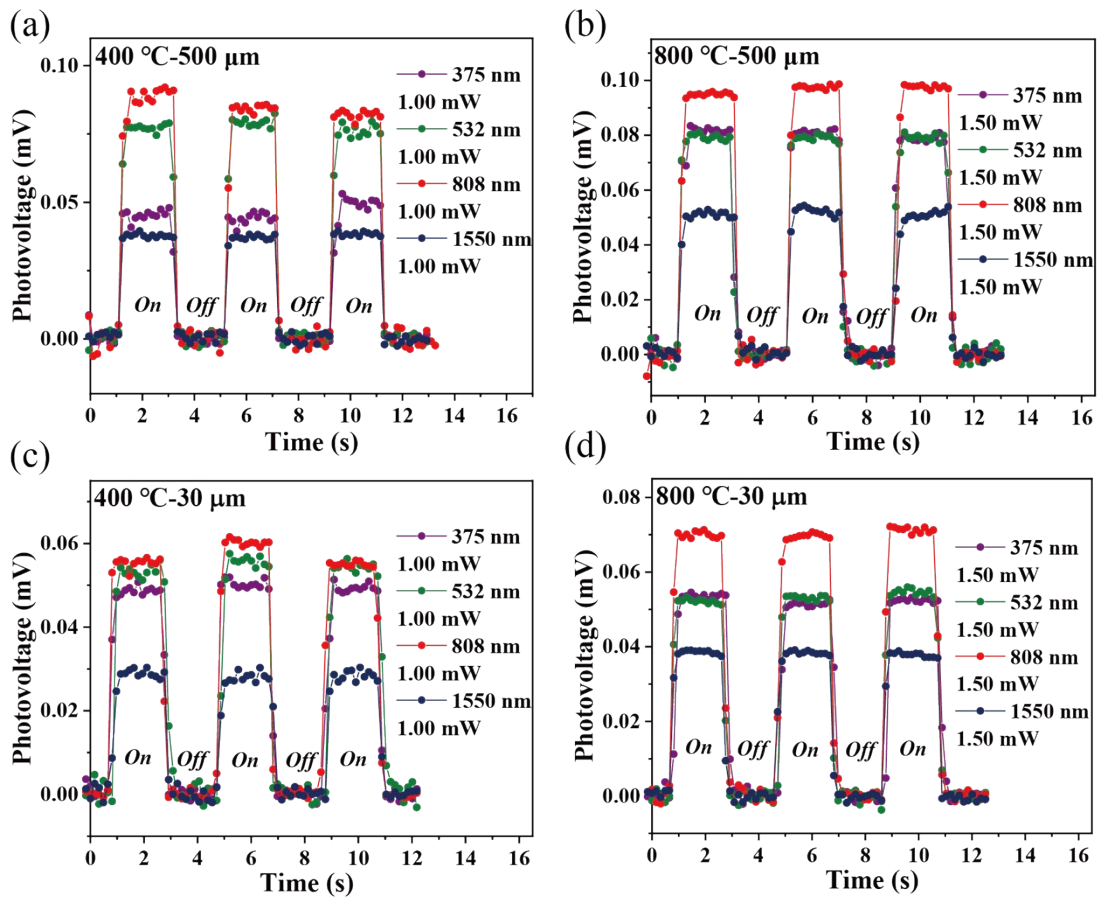

**Fig. S5.** On-off curves of the photovoltages of photodetectors annealed at (a) 400 and (b) 800  $^{\circ}\text{C}$  with the 500  $\mu\text{m}$  channel and annealed at (c) 400 and (d) 800  $^{\circ}\text{C}$  with the 30  $\mu\text{m}$  channel when illuminated at different light wavelengths.

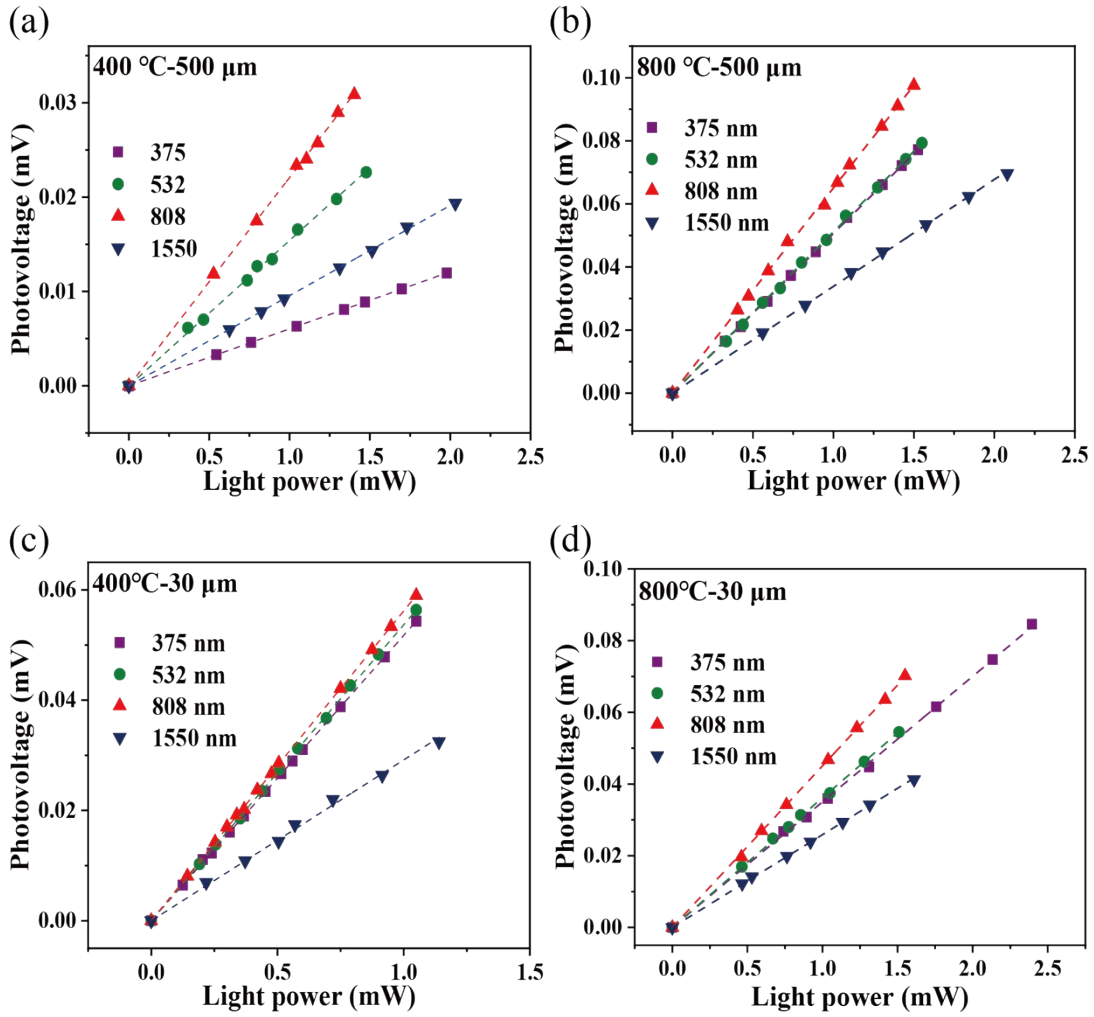

**Fig. S6.** Dependence of photovoltage on light power under UV to NIR illumination of detectors with 500- $\mu\text{m}$ -wide channels annealed at (a) 400 and (b) 800 °C and detectors with 30- $\mu\text{m}$ -wide channels annealed at (c) 400 and (d) 800 °C.

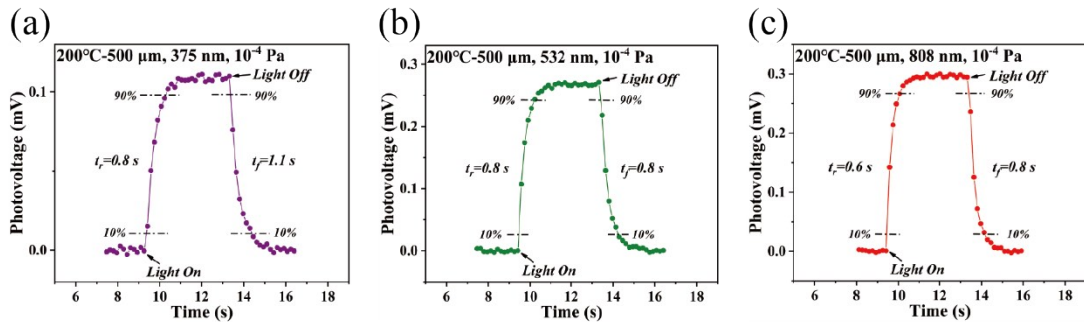

**Fig. S7.** Rise time  $t_r$  and fall time  $t_f$  characteristics of the photodetector with the 500- $\mu\text{m}$ -wide channel annealed at 200 °C in the vacuum ( $10^{-4}$  Pa) under (a) 375 nm, (b) 532 nm and (c) 808 nm.

**Table S1.** Comparison of the  $t_r$  and  $t_f$  values of the Pd-rGO-Ti photodetectors with the different channel widths and annealing temperatures under 2.52 THz illumination.

| <b>Annealing temperature<br/>(°C)</b> |                                                     | <b>200</b>  | <b>400</b>  | <b>600</b>  | <b>800</b>  | <b>1000</b> |
|---------------------------------------|-----------------------------------------------------|-------------|-------------|-------------|-------------|-------------|
| <b><math>t_r/t_f</math></b>           | <b>Pd-rGO-Ti<br/>(500 <math>\mu\text{m}</math>)</b> | 213.2/245.1 | 175.6/169.9 | 165.4/159.6 | 201.9/193.4 | 154.6/154.6 |
|                                       | <b>Pd-rGO-Ti<br/>(30 <math>\mu\text{m}</math>)</b>  | 133.5/125.4 | 110.4/96.5  | 145.5/145.5 | 188.1/125.4 | 131.7/117.9 |

**Table S2.**  $D^*$  values of Pd-rGO-Ti photodetectors annealed at various temperatures under illumination in the UV to THz range.

| <b>Annealing temperature (°C)</b>                                                        |                                       | <b>200</b>                                                | <b>400</b> | <b>600</b> | <b>800</b> | <b>1000</b> |      |
|------------------------------------------------------------------------------------------|---------------------------------------|-----------------------------------------------------------|------------|------------|------------|-------------|------|
| <b><math>D^*</math></b><br><b>(<math>10^6 \text{ cm Hz}^{1/2} \text{ W}^{-1}</math>)</b> | <b>375 nm</b>                         | <b>Pd-rGO-Ti</b><br><b>(500 <math>\mu\text{m}</math>)</b> | 4.43       | 4.48       | 7.90       | 13.70       | 5.48 |
|                                                                                          |                                       | <b>Pd-rGO-Ti</b><br><b>(30 <math>\mu\text{m}</math>)</b>  | 2.29       | 4.85       | 12.29      | 11.65       | 4.96 |
|                                                                                          | <b>532 nm</b>                         | <b>Pd-rGO-Ti</b><br><b>(500 <math>\mu\text{m}</math>)</b> | 7.08       | 7.47       | 15.80      | 13.70       | 5.48 |
|                                                                                          |                                       | <b>Pd-rGO-Ti</b><br><b>(30 <math>\mu\text{m}</math>)</b>  | 3.79       | 5.03       | 12.12      | 12.03       | 4.33 |
|                                                                                          | <b>808 nm</b>                         | <b>Pd-rGO-Ti</b><br><b>(500 <math>\mu\text{m}</math>)</b> | 7.08       | 7.47       | 15.80      | 13.70       | 6.85 |
|                                                                                          |                                       | <b>Pd-rGO-Ti</b><br><b>(30 <math>\mu\text{m}</math>)</b>  | 4.53       | 5.26       | 14.34      | 14.99       | 7.64 |
|                                                                                          | <b>1550 nm</b>                        | <b>Pd-rGO-Ti</b><br><b>(500 <math>\mu\text{m}</math>)</b> | 4.43       | 3.20       | 6.32       | 9.13        | 4.57 |
|                                                                                          |                                       | <b>Pd-rGO-Ti</b><br><b>(30 <math>\mu\text{m}</math>)</b>  | 1.64       | 2.73       | 7.05       | 8.61        | 2.90 |
|                                                                                          | <b>10.6 <math>\mu\text{m}</math></b>  | <b>Pd-rGO-Ti</b><br><b>(500 <math>\mu\text{m}</math>)</b> | 4.89       | 2.37       | 4.64       | 2.91        | 5.29 |
|                                                                                          |                                       | <b>Pd-rGO-Ti</b><br><b>(30 <math>\mu\text{m}</math>)</b>  | 1.37       | 2.04       | 6.27       | 4.15        | 3.79 |
|                                                                                          | <b>118.8 <math>\mu\text{m}</math></b> | <b>Pd-rGO-Ti</b><br><b>(500 <math>\mu\text{m}</math>)</b> | 1.86       | 1.24       | 3.95       | 2.74        | 9.13 |
|                                                                                          |                                       | <b>Pd-rGO-Ti</b><br><b>(30 <math>\mu\text{m}</math>)</b>  | 1.06       | 1.84       | 2.55       | 2.00        | 5.17 |
